# Supplementary material for: Childhood Tuberculosis in Northern Viet Nam: A Review of 103 Cases
Source: PubMed Central journal article supplement (PMC4018290; doi:10.1371/journal.pone.0097267), 2014-05-12
Supplement: pone.0097267.s001.pdf [file pone.0097267.s001.pdf]

**DEMOGRAPHICS**

- 1) Patient Study Code:
- 2) Patient Hospital Medical Record Number:
- 3) Patient Name: \_\_\_\_\_
- 4) Date of birth  
  /   /
- 5) Gender:  Male  
 Female
- 6) Ethnicity:  Kinh  
 Other (specify) \_\_\_\_\_
- 7) Nationality:  Vietnam  
 Other (specify) \_\_\_\_\_
- 8) Patient Address:  
Number/Street \_\_\_\_\_  
Commune \_\_\_\_\_  
District \_\_\_\_\_  
City \_\_\_\_\_
- 9) Referred from  
 Home/Family  
 District Hospital  
 City Hospital  
a) Date of admission to local hospital (if applicable)  
  /   /
- 10) Date of admission to National Hospital  
  /   /
- 11) Date of discharge from National Hospital  
  /   /
- 12) Discharged to  
 Deceased  
 Home/Family  
 District Hospital → see q.12a  
 City Hospital → see q.12a  
a) **If transferred to other hospital**, list hospital address:  
Number/Street \_\_\_\_\_  
Commune \_\_\_\_\_  
District \_\_\_\_\_

**CLINICAL CHARACTERISTIC**

Patient code



- 16) Prematurity:  
Y                      N
- 17) Birth Weight:  
  .  kg
- 18) Significant prior medical problems  
Y                      N  
 If yes, specify \_\_\_\_\_
- 19) History of TB contact  
Y                      N
- 20) Admission Height:  
   cm
- 21) Admission Weight:  
  .  Kg
- 22) Has the patient had previous history of TB prior to admission to National Hospital?  
Y                      N
- a) **If yes**, what were sites of disease?
- Pulmonary
  - Pleural
  - Lymphatic - Extrathoracic
  - Meningeal
  - Osteoarticular
    - Specify:  Skeletal
      - Long bone
      - Joint
      - Other
  - Abdominal
    - Specify:  Peritoneal
      - Intestinal
      - Other
  - Miliary/ Disseminated
  - Other (specify) \_\_\_\_\_
  - Unknown
- b) **If yes**, was patient treated?    Y                      N                      Unknown
1. **If yes**, list regimen:
- a) Intensive phase
    - 2SHRZ
    - 2SHRZE/1HRZE
    - 2SHRZE
    - 2HRZ
    - Other (specify) \_\_\_\_\_
  - b) Continuation phase
    - 6HE
    - 4HR
    - 5R3H3E3 or 5HRE

- Other (specify) \_\_\_\_\_
2. **If yes**, what is patient's treatment status prior to admission to National Hospital?
- Completed (treatment completion)
- Cured (treatment completion and sputum microscopy negative for AFB at the end of treatment and one previous occasion)
- In progress  
If in progress, how many days of therapy has patient received? \_\_\_\_ days
- Defaulted (treatment interrupted for 2 or more months)
- Unknown
- Other (specify) \_\_\_\_\_
- 23) Tuberculin Skin Test (Mantoux) result:  
  mm
- 24) BCG Vaccination  
 Y  No/Unknown
- 25) HIV Status  
 Positive  Negative  Unknown

## Diagnosics

- 26) Chest Radiograph Results  
 Normal  Abnormal
- a) **If abnormal**, what is pattern of abnormality? (mark all applicable)
- Lobar consolidation
- Cavitory lesion
- Micronodular lesions
- Intrathoracic adenopathy
- Miliary
- Pleural effusion
- Other abnormalities
- 27) Biopsy result: (if not performed, leave blank)
- a) Location:
- Bone
- Lymph node
- Skin
- Liver
- Bone marrow
- Other (specify) \_\_\_\_\_
- b) Result:
- Typical tuberculosis (caseating epithelioid granuloma)
- Atypical features but suggests tuberculosis (noncaseating granuloma)
- Other
- 28) Culture and microscopy results:
- Date Specimen Obtained:   /   /
- Source:
- AFB Smear:
- M.tb Culture:

|  |  |
|--|--|
|  |  |
|  |  |
|  |  |
|  |  |

 / 

|  |  |
|--|--|
|  |  |
|  |  |
|  |  |
|  |  |

 / 

|  |  |
|--|--|
|  |  |
|  |  |
|  |  |
|  |  |

|  |  |
|--|--|
|  |  |
|  |  |
|  |  |
|  |  |

|                            |                            |                            |                            |
|----------------------------|----------------------------|----------------------------|----------------------------|
| <input type="checkbox"/> + | <input type="checkbox"/> - | <input type="checkbox"/> + | <input type="checkbox"/> - |
| <input type="checkbox"/> + | <input type="checkbox"/> - | <input type="checkbox"/> + | <input type="checkbox"/> - |
| <input type="checkbox"/> + | <input type="checkbox"/> - | <input type="checkbox"/> + | <input type="checkbox"/> - |
| <input type="checkbox"/> + | <input type="checkbox"/> - | <input type="checkbox"/> + | <input type="checkbox"/> - |
| <input type="checkbox"/> + | <input type="checkbox"/> - | <input type="checkbox"/> + | <input type="checkbox"/> - |

Source code:

- |                         |                  |                                |
|-------------------------|------------------|--------------------------------|
| 01 sputum               | 04 Pleural fluid | 07 Urine                       |
| 02 gastric lavage       | 05 CSF           | 08 Other biopsy (specify)_____ |
| 03 bronchoscopy washing | 06 LN biopsy     | 09 Other fluid (specify)_____  |

a) If culture is positive, indicate resistance pattern:

|          | Sensitive                | Resistant                |
|----------|--------------------------|--------------------------|
| Rifampin | <input type="checkbox"/> | <input type="checkbox"/> |
| INH      | <input type="checkbox"/> | <input type="checkbox"/> |
| PZA      | <input type="checkbox"/> | <input type="checkbox"/> |
| EMB      | <input type="checkbox"/> | <input type="checkbox"/> |
| Strep    | <input type="checkbox"/> | <input type="checkbox"/> |

### Treatment Regimen

29) Prescribed Regimen

a) Planned regimen:

- 1) Intensive phase
  - 2RHZS
  - 2RHZES/1RHZE
  - 2RHZES
  - 2RHZ
  - Other (specify)\_\_\_\_\_
- 2) Continuation phase
  - 6HE
  - 4RH
  - 5RHE
  - Other (specify)\_\_\_\_\_

b) Documented duration at National Hospital \_\_\_\_ days

30) Was treatment interrupted during this hospitalization?

Y      N

a) If yes, what was reason for interruption? \_\_\_\_\_

31) Were there adverse events to therapy requiring discontinuation?

Y      N → skip to q.33

a) If yes, after how many days? \_\_\_\_ days

b) If yes, what was adverse reaction?

- hepatotoxicity
- rash
- nausea/vomiting
- arthritis
- optic neuritis

Patient code 

|  |  |  |
|--|--|--|
|  |  |  |
|--|--|--|

- other (specify) \_\_\_\_\_
- c) **If yes**, to what drug?
  - INH
  - Rifampin
  - PZA
  - Other (specify) \_\_\_\_\_
- d) **If yes**, what is alternate regimen used? \_\_\_\_\_
- e) **If yes**, documented duration of alternative regimen at National Hospital \_\_\_\_ days

32) Were there adverse events to alternative regimen requiring discontinuation?

- Y                       N → skip to q.33
- f) **If yes**, after how many days? \_\_\_\_\_ days
- g) **If yes**, what was adverse reaction?
  - hepatotoxicity
  - rash
  - nausea/vomiting
  - arthritis
  - optic neuritis
  - other (specify) \_\_\_\_\_
- h) **If yes**, to what drug?
  - INH
  - Rifampin
  - PZA
  - Other (specify) \_\_\_\_\_
- i) **If yes**, what is alternate regimen used? \_\_\_\_\_
- j) **If yes**, documented duration at National Hospital \_\_\_\_ days

33) Were steroids used?

- Y                       N → skip to q.34
- a) **If yes**, which drug
  - Prednisone
  - Methylprednisolone
  - Other
- b) **If yes**, list dose \_\_\_\_\_ mg
- c) **If yes**, planned duration \_\_\_\_\_ days
- d) **If yes**, documented duration at National Hospital \_\_\_\_\_ days

34) Were any **THERAPEUTIC** surgical intervention performed?

- Y                       N
- If yes**, please specify procedure:
- \_\_\_\_\_
- \_\_\_\_\_

Date:  
  /   /

**OUTCOME**

If deceased, disregard this section.

35) Discharge Weight:  
 .  kg

36) Discharge Height:  
 cm

37) Documented status at time of discharge

Resolved     Improved     No change     Worse     Unavailable → see q.37a

a) **If documented status is unavailable**, what is status of systemic signs and focal symptoms (q.14 and q.15) at time of discharge based on progress notes at time of discharge:

Improved     No change     Worse     Unable to assess
